# Supplementary material for: Cutting-edge nitrogen, boron, and fluorine triply doped chain-like porous carbon nanofibers: a versatile solution for high-performance zinc–air batteries and self-powered water splitting
Source: Royal Society of Chemistry journal article supplement (doi:10.1039/d3ta06387a), 2023-12-11
Supplement: d3ta06387a1.pdf [file d3ta06387a1.pdf]

# Cutting-edge nitrogen, boron, fluorine triply doped chain-like porous carbon nanofibers: a versatile solution for high-performance zinc-air batteries and self-powered water splitting

Alagan Muthurasu<sup>1</sup>, Ishwor Pathak<sup>1</sup>, Debendra Acharya<sup>1</sup>, Yagya Raj Rosyara<sup>1</sup>, Hak Yong Kim<sup>1,2\*</sup>

<sup>1</sup>Department of Nano Convergence Engineering, Jeonbuk National University, Jeonju 561-756, Republic of Korea

<sup>2</sup>Department of Organic Materials and Fiber Engineering, Jeonbuk National University, Jeonju 561-756, Republic of Korea

Corresponding Author's E-mail: [khy@jbnu.ac.kr](mailto:khy@jbnu.ac.kr).

## 1.2 Tafel calculation:

The kinetic current of the RDE mass-transport correction was measured in the Tafel plot by:

$$J_K = \frac{J \times J_L}{J - J_L} \quad (4)$$

Where J, is the calculated current density, J<sub>L</sub> and J<sub>K</sub> are the kinetics and diffusion-limited current density, respectively.

## 1.3 Zn–air battery performance calculation:

The following formula was used to calculate the specific capacity.

$$\text{Specific capacity} = \frac{\text{current} \times \text{service hour}}{\text{weight of consumed zinc}} \quad (5)$$

The following formula was used to calculate the energy density.

$$\text{Energy density} = \frac{\text{current} \times \text{service hour} \times \text{average discharge voltage}}{\text{weight of consumed zinc}} \quad (6)$$

In this study, the crosslinked PVA-BA-PTFE will be converted into B-doped PCNFs. Based on the reaction:

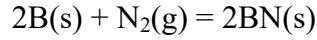

Where  $\text{N}_2$ :  $\Delta_f H_m = 0 \text{ KJ mol}^{-1}$ ;  $\Delta_f G_m = 0 \text{ KJ mol}^{-1}$ ;  $S_m = 191.5 \text{ J mol}^{-1} \text{ K}^{-1}$ ;

B:  $\Delta_f H_m = 0 \text{ KJ mol}^{-1}$ ;  $\Delta_f G_m = 0 \text{ KJ mol}^{-1}$ ;  $S_m = 5.86 \text{ J mol}^{-1} \text{ K}^{-1}$ ;

BN:  $\Delta_f H_m = -254.39 \text{ KJ mol}^{-1}$ ;  $\Delta_f G_m = -228.45 \text{ KJ mol}^{-1}$ ;  $S_m = 14.81 \text{ J mol}^{-1} \text{ K}^{-1}$ ;

Therefore, for this reaction,  $\Delta H = -254.39 \text{ KJ mol}^{-1}$ ;  $\Delta S = -86.8 \text{ J mol}^{-1} \text{ K}^{-1}$ ;  $\Delta G = -228.4 \text{ kJ mol}^{-1} < 0$ ,

Based on the Gibbs function, the reaction between B and  $\text{N}_2$  is considered spontaneous when the value of  $\Delta G$  is less than zero. This implies that the reaction can occur at room temperature. However, it should be noted that high temperatures can speed up the reaction process.

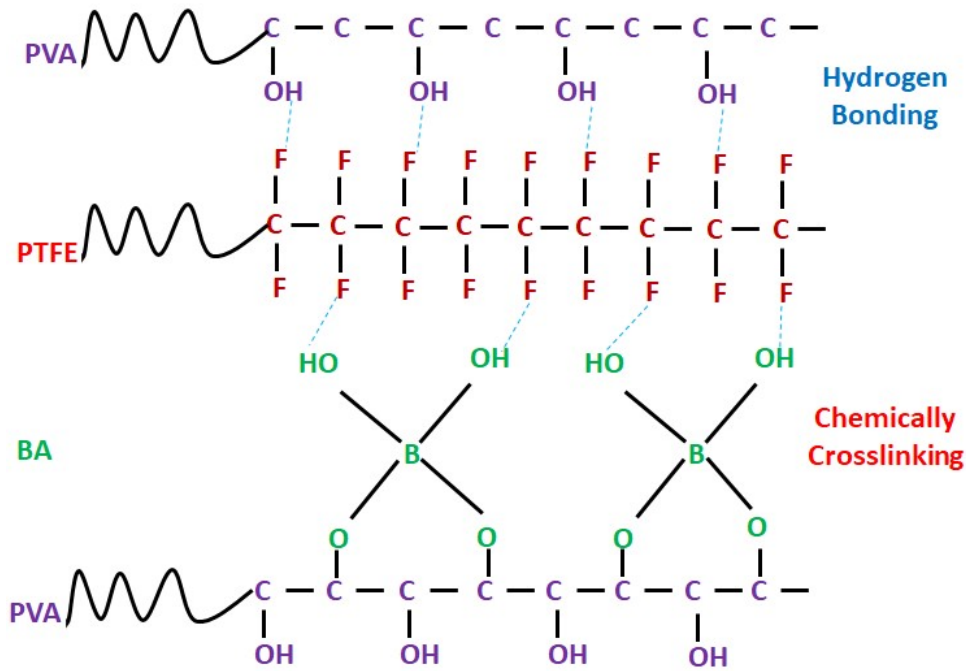

**Figure S1.** A schematic diagram of chemical crosslinking electrospinning to synthesize as-spun fibers.

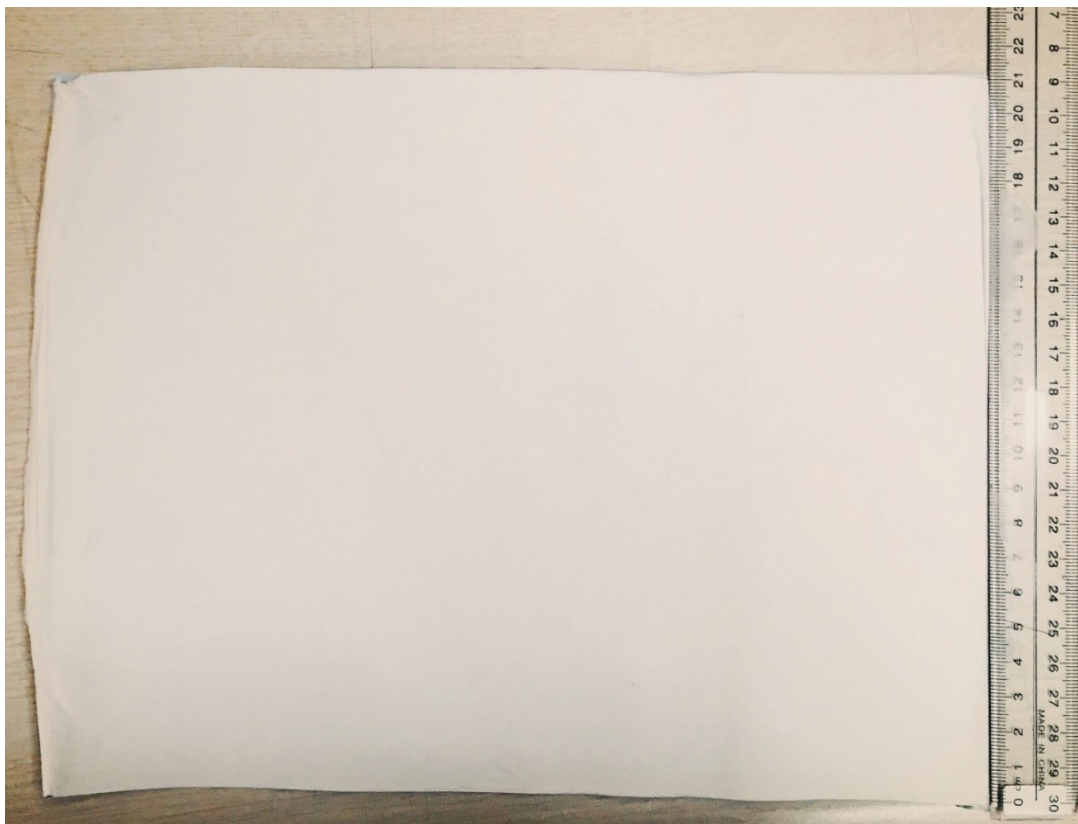

**Figure S2.** A digital photographic image of the as-spun film with a size of 25 cm × 20 cm

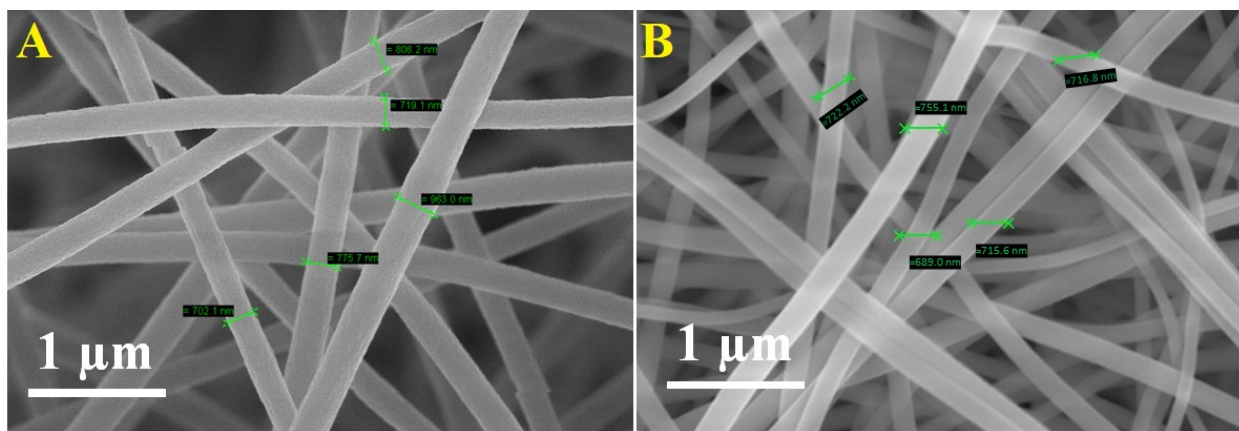

**Figure S3.** FESEM image of the as-spun (A) PVA and (B) PVA: PTFE fiber.

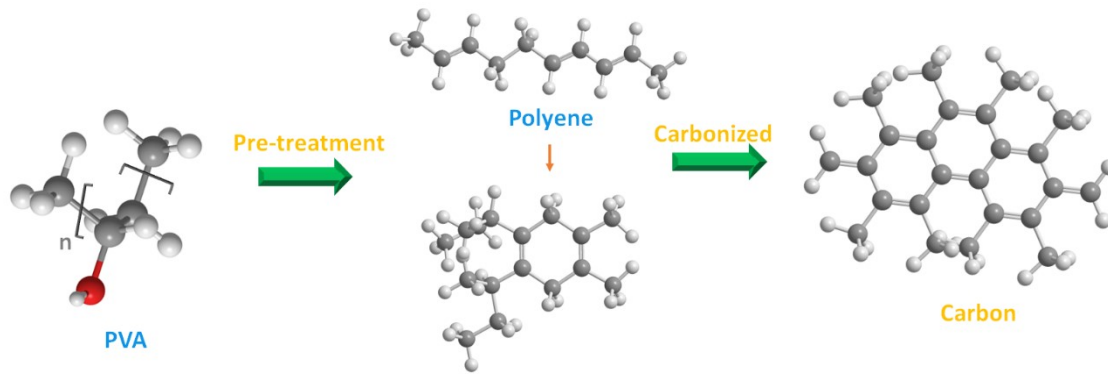

**Figure S4.** Potential PVA activity after the heat treatment method.

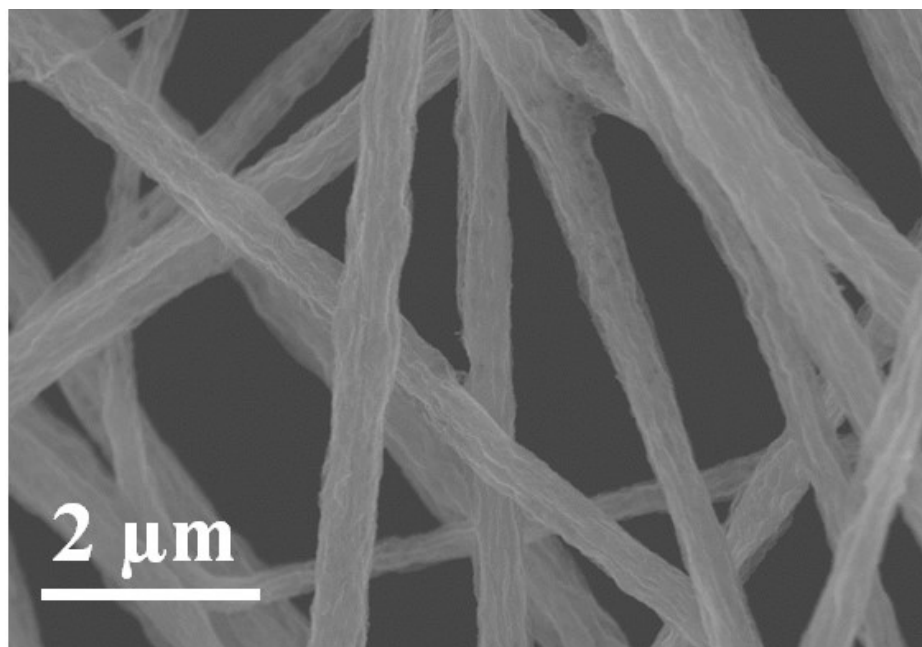

**Figure S5.** FESEM image of the PVA: PTFE oxidized fiber.

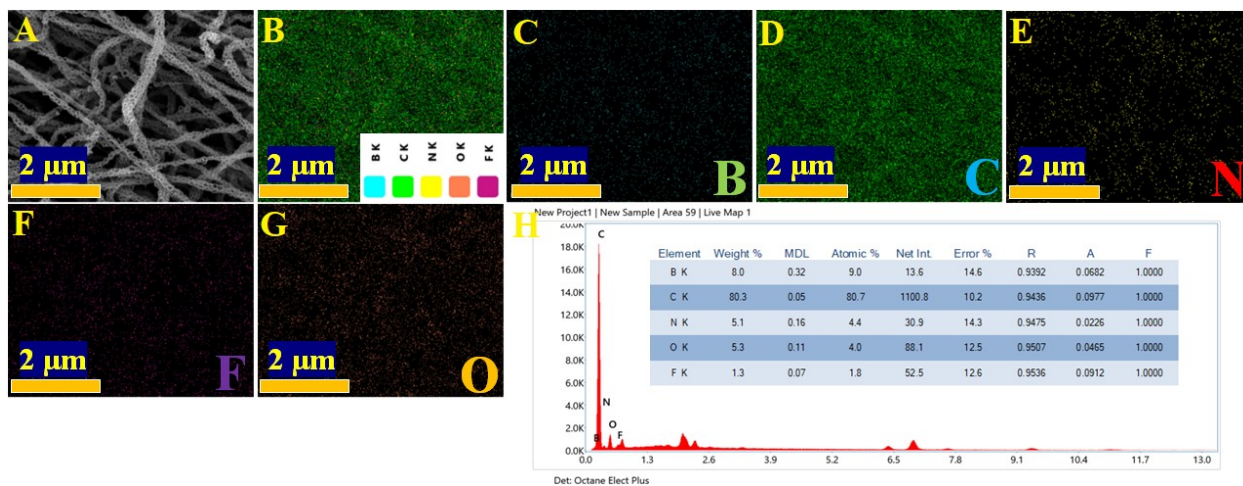

**Figure S6.** (A) FESEM, (B-G) elemental mapping, and (H) EDX spectrum and inset image corresponding elemental compositions of N, B, and F-doped PCNFs.

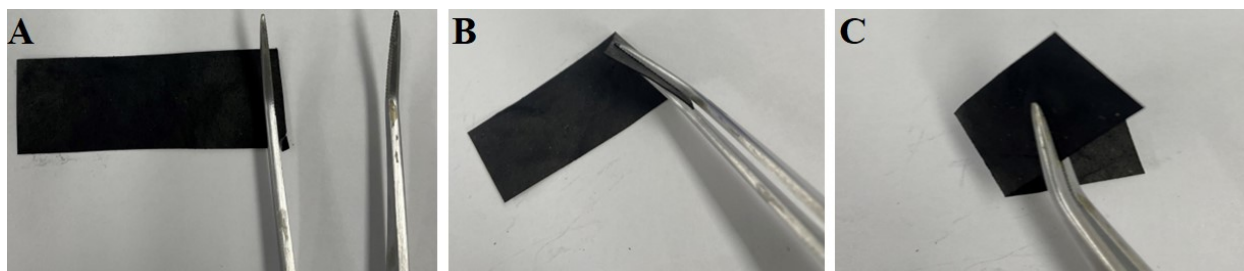

**Figure S7.** Digital photograph of repeated bending of N, B, and F-doped PCNFs.

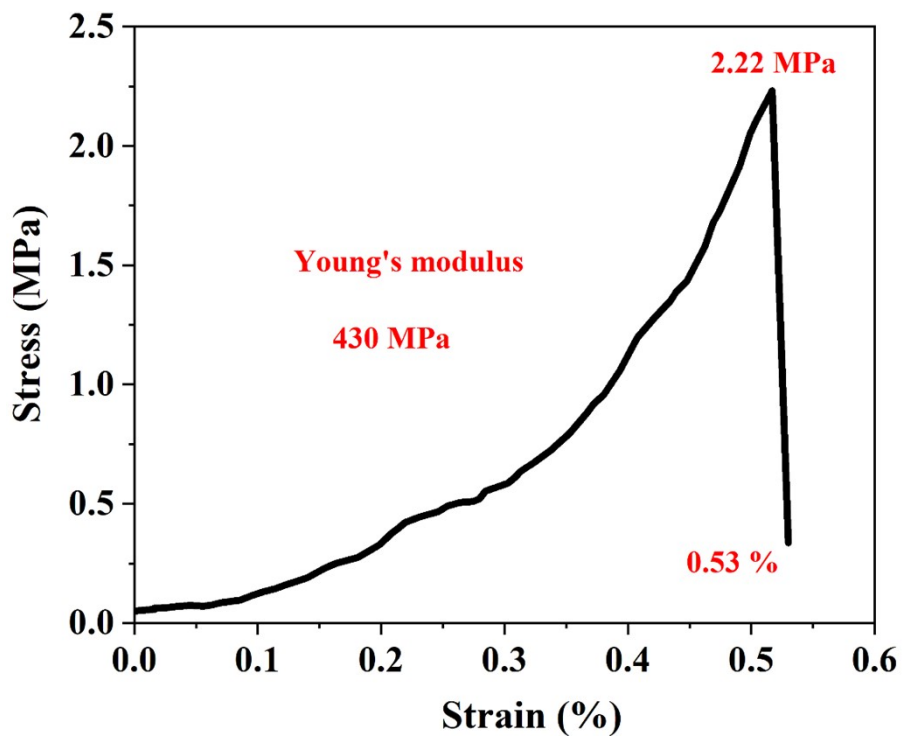

**Figure S8.** Tensile stress–strain curve of the N, B, and F-doped PCNFs film that was made at 1200 °C.

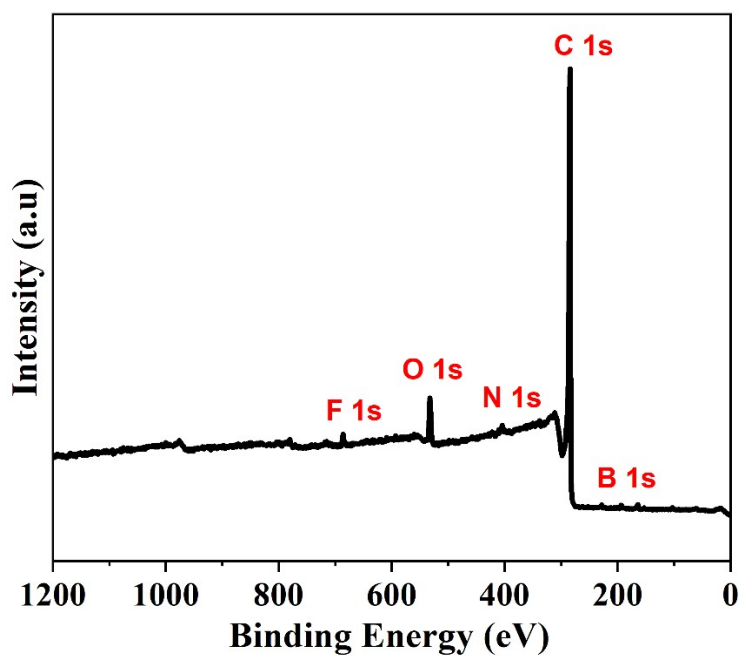

**Figure S9.** XPS survey spectrum of N, B, and F-doped PCNFs.

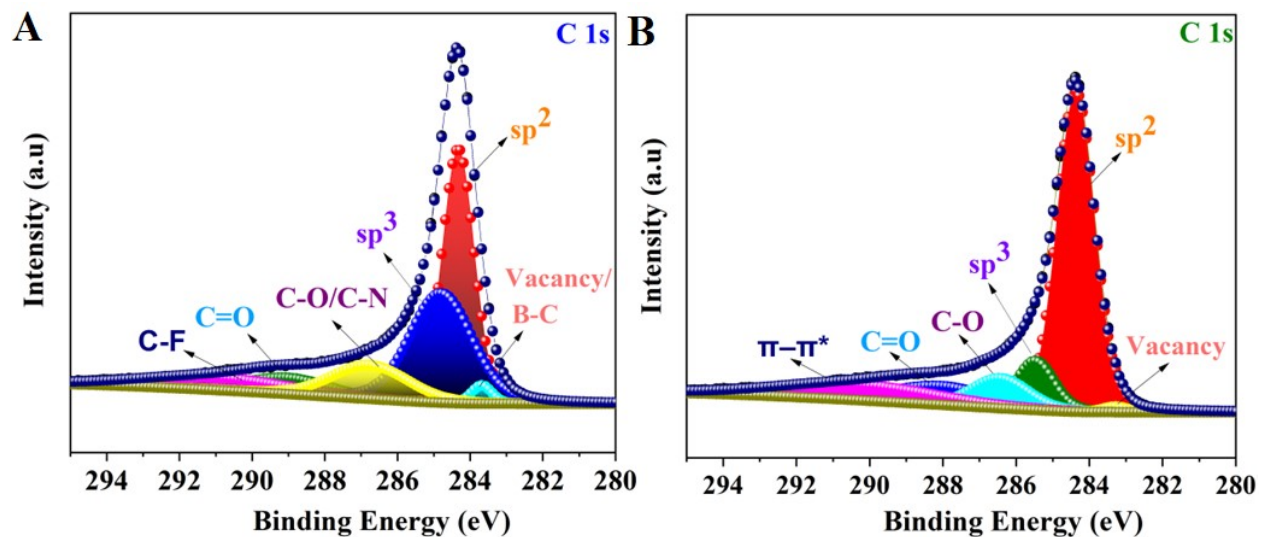

**Figure S10.** High-resolution C 1s XPS spectra of (A) N, B, and F-doped PCNFs, and (B) CNFs respectively.

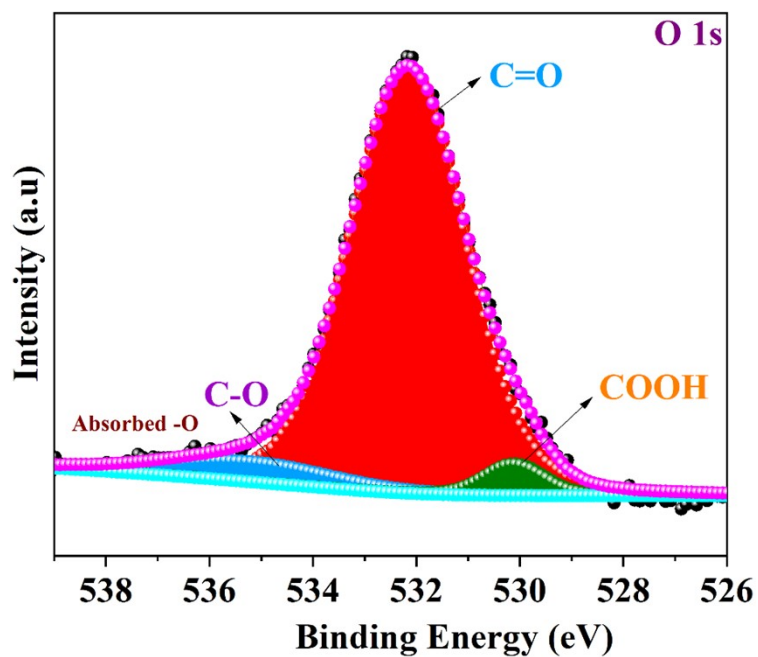

**Figure S11.** High-resolution O 1s XPS spectra of N, B, and F-doped PCNFs.

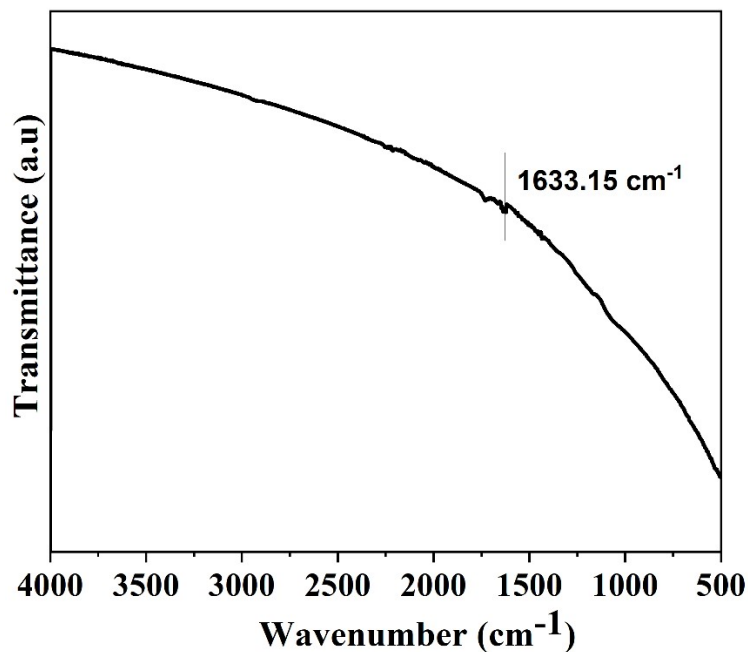

**Figure S12.** FTIR spectrum of N, B, and F-doped PCNFs at 1200 °C.

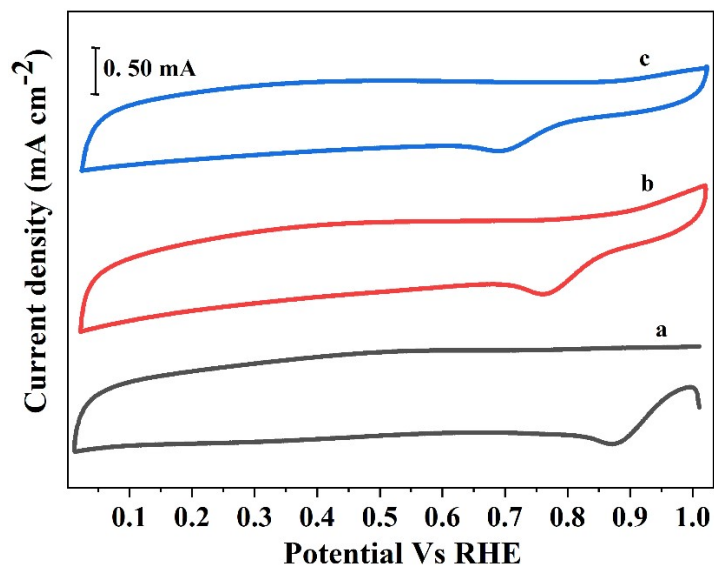

**Figure S13.** CV curves of N, B, and F-doped PCNFs in 0.1 M KOH (a), 0.5 M H<sub>2</sub>SO<sub>4</sub> (b) and 0.01 M PBS electrolytes, respectively.



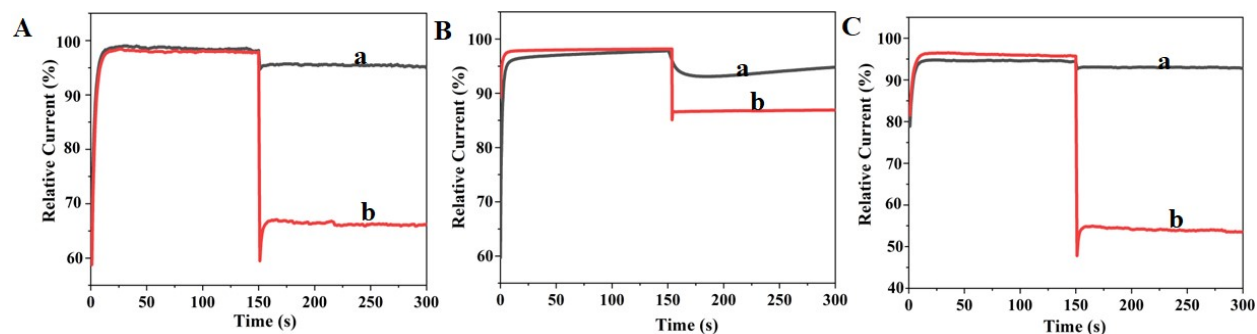

**Figure S14.** Current-time (i-t) chronoamperometric curves of N, B, and F-doped PCNFs (a) and Pt/C (b) with the addition of methanol (3 wt%) at a rotation rate of 1600 rpm on the RDE in 0.1 M KOH (A), 0.5 M H<sub>2</sub>SO<sub>4</sub> (B) and 0.01 M PBS (C) electrolytes.

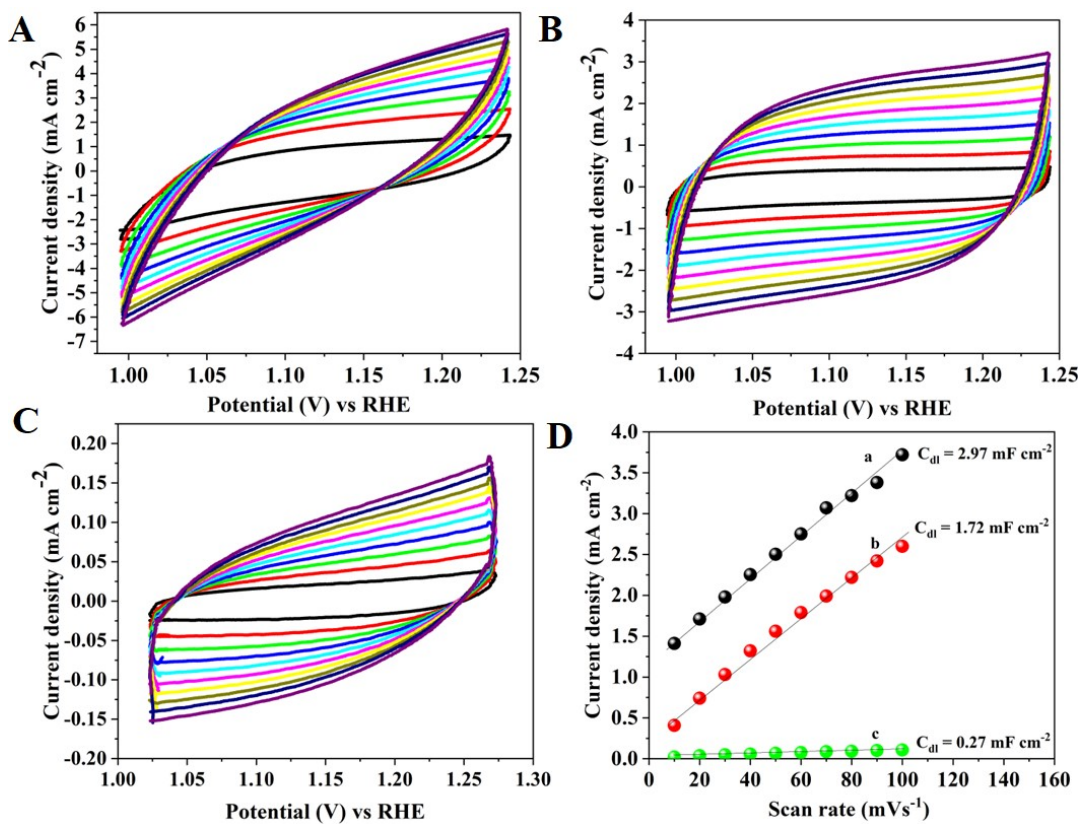

**Figure S15.** CVs of (A) N, B, and F-doped PCNFs, (B) CNF, and (C) GCE at various scan rates in 1.0 M KOH and (D) linear fitting of sweep rates with capacitive current densities for (a) N, B, and F-doped PCNFs, (b) CNF, and (c) GCE catalysts.

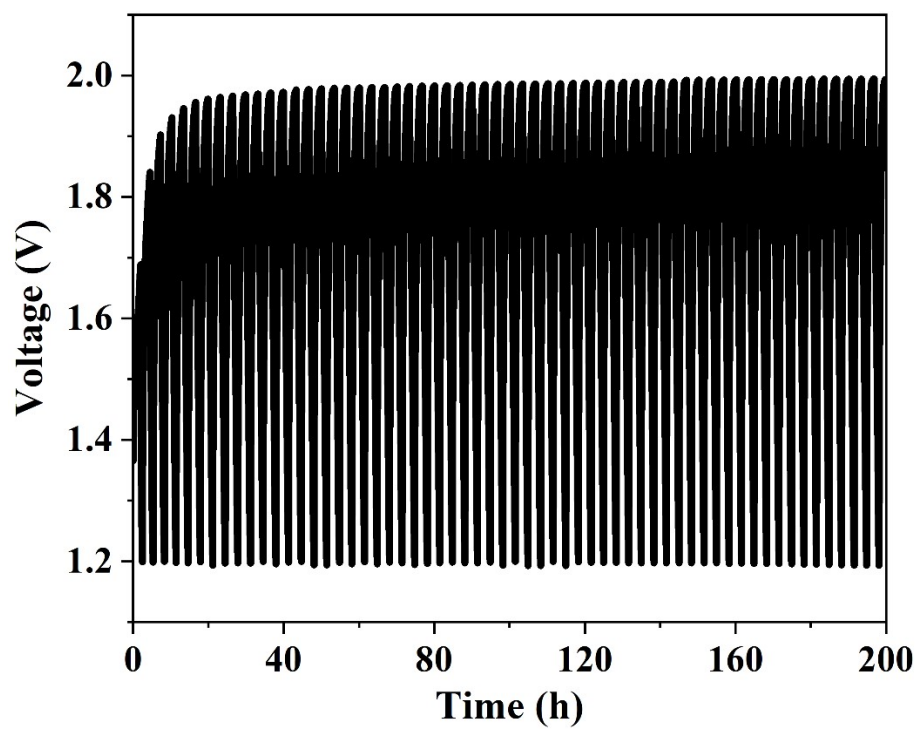

**Figure S16.** Galvanostatic charge and discharge test of N, B, and F-doped PCNFs-based liquid Zn-air batteries at  $5 \text{ mA cm}^{-2}$ .

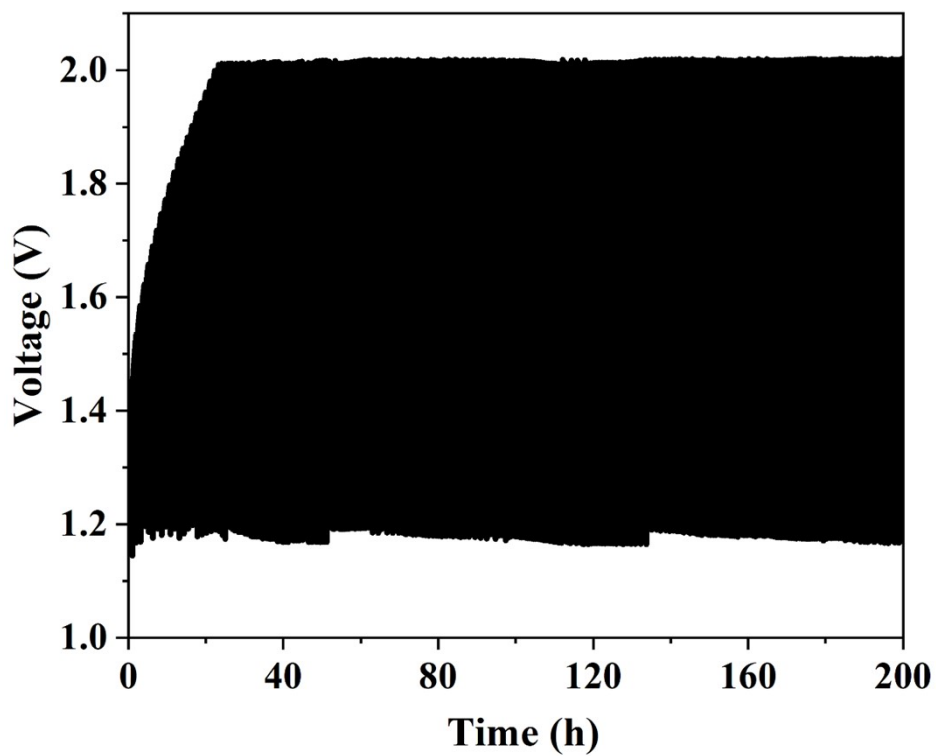

**Figure S17.** Galvanostatic charge and discharge test of N, B, and F-doped PCNFs-based liquid Zn-air batteries at  $10 \text{ mA cm}^{-2}$ .

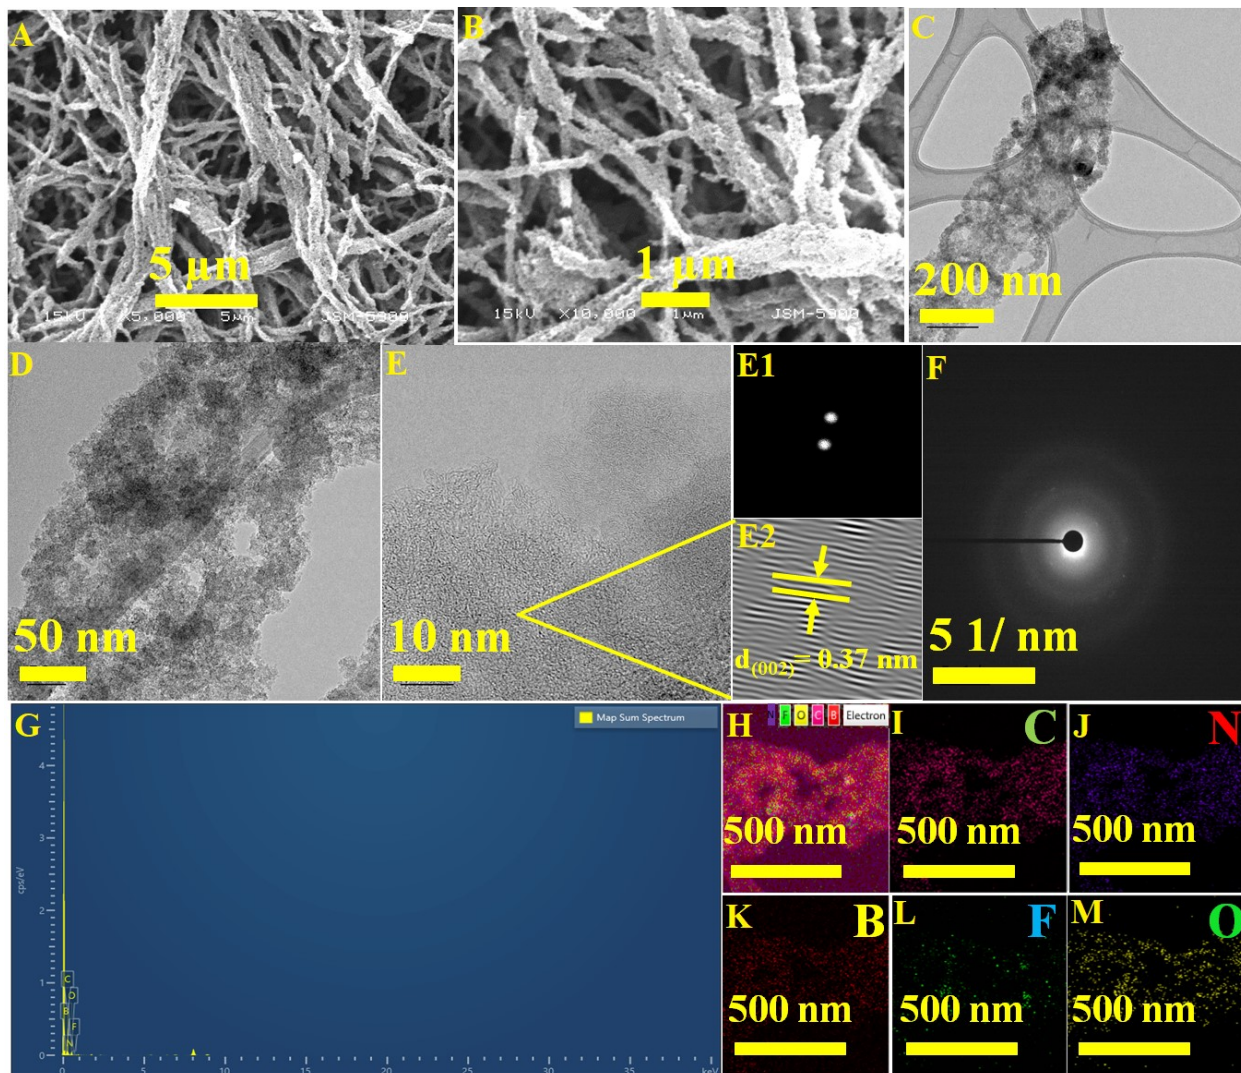

**Figure S18.** (A-B) SEM, (C-D) TEM, (E) HRTEM, (E1) images fast Fourier transfer (FFT) of the area before and after applying the mask, (E2) the inverse fast Fourier transfer (iFFT), (F) SAED pattern, (G) EDX spectrum and (H-O) elemental mapping images of N, B, and F-doped PCNFs after charge and discharge test.

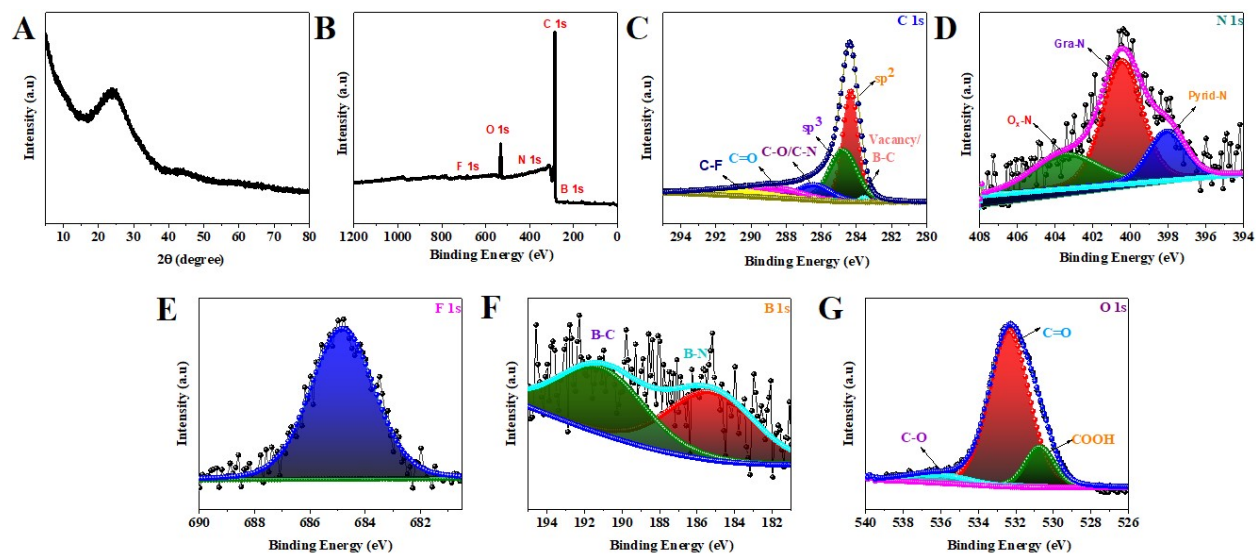

**Figure S19.** (A) XRD patterns, (B) XPS survey spectrum, high-resolution XPS spectra of (C) C 1s, (D) N 1s, (E) F 1s, (F) B 1s, and (G) O 1s for N, B, F-doped PCNFs after charge and discharge test.

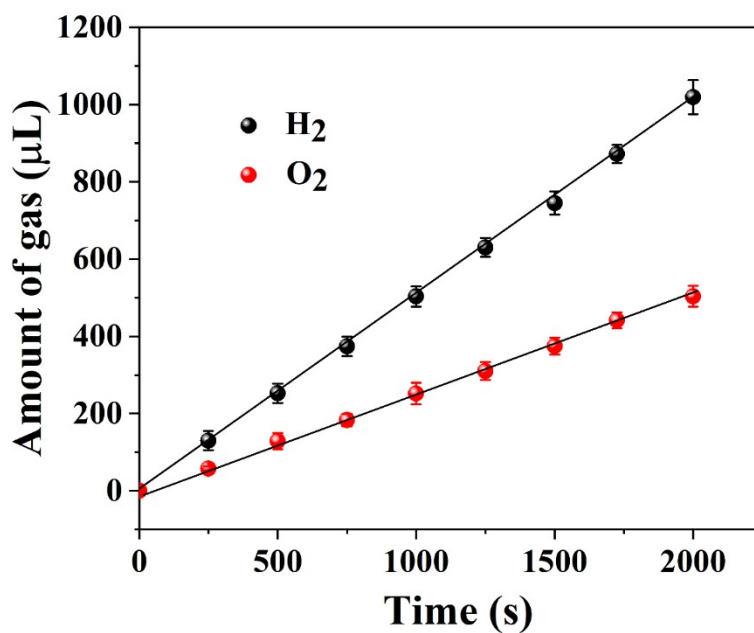

**Figure S20.** Volumes of H<sub>2</sub> and O<sub>2</sub> are produced as a function of water-splitting time.

| Sample              | Vacancy                 | sp <sup>2</sup>          | Sp <sup>3</sup>          | C-O                     | C=O                     | $\pi$ - $\pi^*$         |
|---------------------|-------------------------|--------------------------|--------------------------|-------------------------|-------------------------|-------------------------|
|                     | /C <sub>total</sub> (%) | / C <sub>total</sub> (%) | / C <sub>total</sub> (%) | /C <sub>total</sub> (%) | /C <sub>total</sub> (%) | /C <sub>total</sub> (%) |
| N, B, F-doped PCNFs | 4.7                     | 40.1                     | 29.6                     | 15.4                    | 9.9                     | 5.8                     |
| CNFs                | 1.7                     | 60.2                     | 10.3                     | 8.5                     | 9.4                     | 4.8                     |

**Table S1:** The surface carbon species level in N, B, and F-doped PCNFs and CNFs samples were evaluated using high-resolution C1s XPS spectra.

**Table S2:** The electrocatalytic ORR activity of recently published metal-free ORR catalysts in 0.1M KOH solutions.

| <b>Sample</b>                  | <b>Electrolyte</b>                       | <b>E<sub>onset</sub><br/>(V)</b> | <b>ORR<br/>E<sub>1/2</sub> (V)</b> | <b>Ref</b>       |
|--------------------------------|------------------------------------------|----------------------------------|------------------------------------|------------------|
| NPC@CNF-950                    | 0.1 M KOH                                | 0.85                             | 0.88 V                             | S1               |
| MWCNTs                         | 0.1 M KOH                                | 0.92                             | 0.8                                | S2               |
| GO                             | 0.1 M KOH                                | 0.82                             | -                                  | S3               |
| BNPC-1100                      | 0.1 M KOH                                | 0.894                            | 0.793                              | S4               |
| NBC-1000                       | 0.1 M KOH                                | 0.97                             | 0.84                               | S5               |
| B-OLC-1-20                     | 0.1 M KOH                                | 0.80                             | -                                  | S6               |
| N, P-GC-1000                   | 0.1 M KOH                                | 1.02                             | 0.85                               | S7               |
| N, F-MCFs-A                    | 0.1 M KOH                                | 0.94                             | 0.81                               | S8               |
| FCNPs                          | 0.1 M KOH                                | 1.0                              | -                                  | 61               |
| N-HsGDY                        | 0.1 M KOH                                | 1.02                             | 0.85                               | S9               |
| GSP-1000                       | 0.1 M KOH                                | 1.03                             | 0.85                               | S10              |
| <b>N, B, and F-doped PCNFs</b> | <b>0.1 M KOH</b>                         | <b>0.99</b>                      | <b>0.90</b>                        | <b>This work</b> |
|                                | <b>0.5 M H<sub>2</sub>SO<sub>4</sub></b> | <b>0.90</b>                      | <b>0.79</b>                        |                  |
|                                | <b>0.01 M PBS</b>                        | <b>0.82</b>                      | <b>0.70</b>                        |                  |

**Table S3:** Comparison of the OER activity for various recently reported highly heteroatom doped metal-free catalysts in 1 M KOH solution.

| <b>Sample</b>                  | <b>Overpotential<br/>(@ 10 mA cm<sup>-2</sup>)</b> | <b>Tafel slope<br/>(mV dec<sup>-1</sup>)</b> | <b>Electrolyte</b>                                           | <b>Ref</b>       |
|--------------------------------|----------------------------------------------------|----------------------------------------------|--------------------------------------------------------------|------------------|
| NSCG                           | 310 mV                                             | 65                                           | 1 M KOH                                                      | S11              |
| N, S, O carbon nanosheet       | 420 mV                                             | 53                                           | 1 M KOH                                                      | S12              |
| N, P-carbon paper              | 420 mV                                             | 61.6                                         | 1 M KOH                                                      | S13              |
| NGSHs                          | 420 mV                                             | 83                                           | 1 M KOH                                                      | S14              |
| N-doped graphitic carbon       | 380 mV                                             | -                                            | 1 M KOH                                                      | S15              |
| BNPC-1100                      | 570 mV                                             | 201                                          | 1 M KOH                                                      | S4               |
| N, P-GC-1000                   | 330 mV                                             | 67                                           | 1 M KOH                                                      | S7               |
| 40F-KB                         | 370 mV                                             | -                                            | 1 M KOH                                                      | 62               |
| LC-KOH                         | 470 mV                                             | 105.1                                        | 1 M KOH                                                      | S16              |
| N, S-CNT                       | 360 mV                                             | 56                                           | 1 M KOH                                                      | S17              |
| O-CNT                          | 360 mV                                             | 47.7                                         | 1 M KOH                                                      | S18              |
| <b>N, B, and F-doped PCNFs</b> | <b>280 mV</b><br><b>913 mV</b>                     | <b>87</b><br><b>96</b>                       | <b>1.0 M KOH</b><br><b>0.5 M H<sub>2</sub>SO<sub>4</sub></b> | <b>This work</b> |

**Table S4:** A comparison study of carbon-based rechargeable Zn-air batteries using liquid alkaline electrolytes.

| Sample                         | OCP (V)      | Power density /mW cm <sup>-2</sup> | Specific capacity /mA h g <sub>Zn</sub> <sup>-1</sup> | Ref              |
|--------------------------------|--------------|------------------------------------|-------------------------------------------------------|------------------|
| NSCG                           | 1.34         | 5.9 mW cm <sup>-2</sup>            | -                                                     | S11              |
| TD-CFs                         | 1.46         | -                                  | -                                                     | 23               |
| 2D-PPCN                        | 1.40         | -                                  | 555 mA h g <sub>Zn</sub> <sup>-1</sup>                | S19              |
| NPCS-900                       | 1.40         | 55 mW cm <sup>-2</sup>             | 432 mA h g <sub>Zn</sub> <sup>-1</sup>                | S20              |
| NDGs-800                       | 1.45         | 115.2 mW cm <sup>-2</sup>          | -                                                     | S21              |
| NPS-G-2                        | 1.372        | 151 mW cm <sup>-2</sup>            | 686 mA h g <sub>Zn</sub> <sup>-1</sup>                | 12               |
| BN/C                           | 1.36         | 115 mW cm <sup>-2</sup>            | 802 W h kg <sub>Zn</sub> <sup>-1</sup>                | S22              |
| o-CC-H <sub>2</sub>            | -            | 91.4 mW cm <sup>-2</sup>           | 707 mAh g <sup>-1</sup>                               | S23              |
| NCN-1000-5                     | 1.44         | 207 mW cm <sup>-2</sup>            | 672 mA h g <sup>-1</sup>                              | S24              |
| O-N-CNs                        | 1.49         | 89 mW cm <sup>-2</sup>             | 660 mAh g <sup>-1</sup>                               | S25              |
| N-CNF                          | 1.50         | -                                  | 615 mAh g <sup>-1</sup>                               | S26              |
| <b>N, B, and F-doped PCNFs</b> | <b>1.453</b> | <b>151.9 mW cm<sup>-2</sup></b>    | <b>729 mA h g<sub>Zn</sub><sup>-1</sup></b>           | <b>This work</b> |



## References

- S1 Y. Li, M. Chen, M. Chu, X. Wang, Y. Wang, X. Lin and X. Cao, *ChemElectroChem*, 2021, **8**, 829–838.
- S2 Y. Pei, H. Song, Y. Liu, Y. Cheng, W. Li, Y. Chen, Y. Fan, B. Liu and S. Lu, *J. Colloid Interface Sci.*, 2021, **600**, 865–871.
- S3 M. Zhang, H. Tao, Y. Liu, C. Yan, S. Hong, J. Masa, A. W. Robertson, S. Liu, J. Qiu and Z. Sun, *ACS Sustain. Chem. Eng.*, 2019, **7**, 3434–3442.
- S4 Y. Qian, Z. Hu, X. Ge, S. Yang, Y. Peng, Z. Kang, Z. Liu, J. Y. Lee and D. Zhao, *Carbon N. Y.*, 2017, **111**, 641–650.
- S5 Y. Zhou, Y. Sun, H. Wang, C. Zhu, J. Gao, D. Wu, H. Huang, Y. Liu and Z. Kang, *Inorg. Chem. Front.*, 2018, **5**, 2985–2991.
- S6 Y. Lin, Y. Zhu, B. Zhang, Y. A. Kim, M. Endo and D. S. Su, *J. Mater. Chem. A*, 2015, **3**, 21805–21814.
- S7 Z. Zhou, A. Chen, X. Fan, A. Kong and Y. Shan, *Appl. Surf. Sci.*, 2019, **464**, 380–387.
- S8 T. Gong, R. Qi, X. Liu, H. Li and Y. Zhang, *Nano-Micro Lett.*, 2019, **11**, 1–11.
- S9 Q. Lv, W. Si, J. He, L. Sun, C. Zhang, N. Wang, Z. Yang, X. Li, X. Wang, W. Deng, Y. Long, C. Huang and Y. Li, *Nat. Commun.*, 2018, **9**, 3376.
- S10 B. Huang, Y. Liu, X. Huang and Z. Xie, *J. Mater. Chem. A*, 2018, **6**, 22277–22286.
- S11 S. Chen, J. Duan, Y. Zheng, X. Chen, X. W. Du, M. Jaroniec and S. Z. Qiao, *Energy Storage Mater.*, 2015, **1**, 17–24.
- S12 K. Qu, Y. Zheng, S. Dai and S. Z. Qiao, *Nano Energy*, 2016, **19**, 373–381.
- S13 T. Y. Ma, J. Ran, S. Dai, M. Jaroniec and S. Z. Qiao, *Angew. Chemie - Int. Ed.*, 2015, **54**, 4646–4650.
- S14 G. L. Tian, M. Q. Zhao, D. Yu, X. Y. Kong, J. Q. Huang, Q. Zhang and F. Wei, *Small*, 2014, **10**, 2251–2259.
- S15 Y. Zhao, R. Nakamura, K. Kamiya, S. Nakanishi and K. Hashimoto, *Nat. Commun.*, 2013,

- 4, 2390.
- S16 M. Devi, C. Madan, A. Halder and S. Sharma, *Carbon Trends*, 2022, **9**, 100221.
- S17 K. Qu, Y. Zheng, Y. Jiao, X. Zhang, S. Dai and S. Z. Qiao, *Adv. Energy Mater.*, 2017, **7**, 1602068.
- S18 L. Li, H. Yang, J. Miao, L. Zhang, H. Y. Wang, Z. Zeng, W. Huang, X. Dong and B. Liu, *ACS Energy Lett.*, 2017, **2**, 294–300.
- S19 W. Lei, Y. P. Deng, G. Li, Z. P. Cano, X. Wang, D. Luo, Y. Liu, D. Wang and Z. Chen, *ACS Catal.*, 2018, **8**, 2464–2472.
- S20 S. Chen, L. Zhao, J. Ma, Y. Wang, L. Dai and J. Zhang, *Nano Energy*, 2019, **60**, 536–544.
- S21 Q. Wang, Y. Ji, Y. Lei, Y. Wang, Y. Wang, Y. Li and S. Wang, *ACS Energy Lett.*, 2018, **3**, 1183–1191.
- S22 R. Zhao, Q. Li, Z. Chen, V. Jose, X. Jiang, G. Fu, J. M. Lee and S. Huang, *Carbon N. Y.*, 2020, **164**, 398–406.
- S23 H. F. Wang, C. Tang, B. Wang, B. Q. Li, X. Cui and Q. Zhang, *Energy Storage Mater.*, 2018, **15**, 124–130.
- S24 H. Jiang, J. Gu, X. Zheng, M. Liu, X. Qiu, L. Wang, W. Li, Z. Chen, X. Ji and J. Li, *Energy Environ. Sci.*, 2019, **12**, 322–333.
- S25 J. J. Lv, Y. Li, S. Wu, H. Fang, L. L. Li, R. Bin Song, J. Ma and J. J. Zhu, *ACS Appl. Mater. Interfaces*, 2018, **10**, 11678–11688.
- S26 H. W. Liang, Z. Y. Wu, L. F. Chen, C. Li and S. H. Yu, *Nano Energy*, 2015, **11**, 366–376.
